# Supplementary material
Source: PubMed Central journal article supplement (PMC8967065)
Supplement: NIHMS1725292-supplement-Suppl__Table_1.pdf [file NIHMS1725292-supplement-Suppl__Table_1.pdf]

Supplementary Table 1 | *Drosophila* PCP genes and their vertebrate homologues involved in kidney development

| PCP genes                                                                    |                                                                                                                                                                                                             | Protein properties, interactions with other PCP molecules and subcellular localization                                                                                                                                                                                                                                                                                  | Expression patterns and mutant PCP phenotypes                                                                                                                                                                    |                                                                                                                                                                                                                                                                                                                                                                                                                                        |                                                                                                                                                                                                                                                                                                                                                                                                                                                              | Human diseases associated with PCP gene mutations                                                                                                                                                 |
|------------------------------------------------------------------------------|-------------------------------------------------------------------------------------------------------------------------------------------------------------------------------------------------------------|-------------------------------------------------------------------------------------------------------------------------------------------------------------------------------------------------------------------------------------------------------------------------------------------------------------------------------------------------------------------------|------------------------------------------------------------------------------------------------------------------------------------------------------------------------------------------------------------------|----------------------------------------------------------------------------------------------------------------------------------------------------------------------------------------------------------------------------------------------------------------------------------------------------------------------------------------------------------------------------------------------------------------------------------------|--------------------------------------------------------------------------------------------------------------------------------------------------------------------------------------------------------------------------------------------------------------------------------------------------------------------------------------------------------------------------------------------------------------------------------------------------------------|---------------------------------------------------------------------------------------------------------------------------------------------------------------------------------------------------|
| <i>Drosophila</i>                                                            | Vertebrates                                                                                                                                                                                                 |                                                                                                                                                                                                                                                                                                                                                                         | <i>Drosophila</i>                                                                                                                                                                                                | Vertebrates                                                                                                                                                                                                                                                                                                                                                                                                                            | Role in kidney development                                                                                                                                                                                                                                                                                                                                                                                                                                   |                                                                                                                                                                                                   |
| <i>Frizzled (fz)</i><br><i>Frizzled2(fz2)</i> <sup>1-3</sup>                 | <i>Fzd1, Fzd2, Fzd3*</i> ,<br><i>Fzd4*, Fzd5, Fzd6*</i> ,<br><i>Fzd7, Fzd8*, Fzd9,</i><br><i>Fzd10</i>                                                                                                      | Seven-pass transmembrane receptor, localizes asymmetrically in both <i>Drosophila</i> and vertebrate cells. Binds Wnt ligands, recruits Dvl and Dgo to the membrane. Asymmetrically localized and interacts with Fmi and Vang <sup>4,5</sup> .                                                                                                                          | Widely expressed. PCP defects in all tissues studied.                                                                                                                                                            | <i>Fzd</i> genes are often expressed in tissue-specific patterns. Multiple <i>Fzds</i> are in the neuroectoderm, skin, somites and other tissues and organs. <i>Xenopus Fzd8</i> is expressed in the pronephros <sup>6</sup> , <i>Fzd3,4,6</i> and <i>8</i> are expressed in renal tubules <sup>7,8</sup> . Double <i>Fzd3/6</i> homozygous mice exhibit PCP defects in hair organization and <i>craniorachischisis</i> <sup>9</sup> . | <i>xFzd8</i> regulates pronephros development in <i>Xenopus</i> <sup>6</sup> ; Double <i>Fzd4/Fzd8</i> homozygous mutant mice display renal hypoplasia due to UB branching defects <sup>7</sup> .                                                                                                                                                                                                                                                            | <i>FZD4</i> : familial exudative vitreoretinopathy <sup>10</sup> ; <i>FZD6</i> : various NTDs <sup>11</sup> .                                                                                     |
| <i>Dishevelled (dsh)</i> <sup>12</sup>                                       | <i>Dvl1, Dvl2, Dvl3</i>                                                                                                                                                                                     | A multimodular cytoplasmic protein containing the DIX, PDZ and DEP domains. Recruited by Frizzled to the cell membrane and asymmetrically localized in the cortex. Localized to the centrosome. Interacts with Fz, Vang, Pk, Daam1, Dgo and other proteins.                                                                                                             | Widely expressed; PCP defects in all tissues studied.                                                                                                                                                            | Dvl1-3 proteins are widely expressed in multiple tissues in overlapping and tissue-specific patterns and have redundant functions. Simultaneous loss of two or three <i>Dvl</i> genes causes defects in multiple organs including the brain and the heart <sup>13</sup> .                                                                                                                                                              | Wider and shorter pronephros in <i>Xenopus</i> expressing <i>xDvl2</i> mutant that interferes with PCP signalling <sup>14</sup> .                                                                                                                                                                                                                                                                                                                            | <i>DVL1</i> and <i>DVL3</i> : various NTDs <sup>11</sup> ; <i>DVL1</i> : Robinow syndrome (duplicated ureter and VUR are reported) <sup>15</sup> ; <i>DVL3</i> : Robinow syndrome <sup>16</sup> . |
| <i>Prickle (pk)/</i><br><i>Spiny legs (sple1)</i> <sup>17</sup>              | <i>Pk1*, Pk2, Pk3*, Pk4</i>                                                                                                                                                                                 | PET and LIM domain-containing cytoplasmic protein. Interacts with Vangl, Dvl, Dgo and Par3 (Pk3). Recruited to the cell membrane by Vang. Asymmetrically localized in <i>Drosophila</i> wing, zebrafish and <i>Xenopus</i> neuroectoderm.                                                                                                                               | Widely expressed. PCP defects in all tissues studied; Pk and Sple1 isoforms regulate orientation of microtubule polarity <sup>18</sup> .                                                                         | Early embryonic lethality in <i>pk1</i> <sup>-/-</sup> mice <sup>19</sup> . <i>Pk1</i> <sup>-/-</sup> Robinow-like syndrome including facial and skeletal abnormalities <sup>20</sup> ; <i>Pk3</i> depletion in <i>Xenopus</i> causes neural tube and cilia defects <sup>21</sup> .                                                                                                                                                    | Mouse <i>Pk1</i> <sup>-/-</sup> mutants exhibit renal dysplasia; 5% of embryos display renal cysts <sup>20</sup> .                                                                                                                                                                                                                                                                                                                                           | <i>PK1</i> : various NTDs <sup>11,22</sup> ; <i>PK1</i> : epilepsy-ataxia syndrome and other neurological abnormalities <sup>23</sup> .                                                           |
| <i>Flamingo (fmi)</i> or <i>starry night (stan)</i> <sup>24,25</sup>         | <i>Celsr1, Celrs2, Celsr3</i>                                                                                                                                                                               | Cadherin-EGF-LAG seven pass G-type receptor with multiple cadherin domains. Forms homodimers and interacts with Fz and Vang. Asymmetrically localized in <i>Drosophila</i> and mammalian tissues.                                                                                                                                                                       | Widely expressed in all tissues <sup>26</sup> , PCP defects in all tissues studied.                                                                                                                              | Redundant and specific functions. Multiple defects in mutant mice including <i>craniorachischisis (Celsr1</i> <sup>-/-</sup> ) <sup>27</sup> and lethal hydrocephalus ( <i>Celsr2,3</i> <sup>-/-</sup> ) <sup>28</sup> .                                                                                                                                                                                                               | <i>Celsr1</i> <sup>-/-</sup> mice: smaller kidneys with defective UB branching <sup>29</sup> .                                                                                                                                                                                                                                                                                                                                                               | <i>CELSR1-3</i> : various NTDs <sup>11,30,31</sup> . NTDs caused by <i>CELSR1</i> mutations are associated with elevated frequency of kidney malformations <sup>29</sup> .                        |
| <i>Van Gogh (vang)</i> <sup>32,33</sup> or<br><i>Strabismus (stbm)</i>       | <i>Vangl1, Vangl2</i> <sup>34</sup>                                                                                                                                                                         | Tetraspanin with a PDZ-binding domain. Interacts with Pk <sup>35</sup> , Dvl, Fmi, Scribble and extracellularly with Frizzled <sup>36</sup> . Vang is asymmetrically localized in <i>Drosophila</i> and vertebrate tissues, including renal tubules, inner ear, neural plate and the skin.                                                                              | Widely expressed in all tissues; PCP defects in all tissues studied                                                                                                                                              | Multiple organ defects including <i>craniorachischisis</i> , heart, lung, gastrointestinal, skeletal and ocular defects, defective cochlea <sup>34,37,38</sup> .                                                                                                                                                                                                                                                                       | Homozygous <i>Vangl2</i> mutant mice: kidney hypodysplasia, abnormal diameter of renal tubules <sup>8,39,40</sup> . Abnormal glomerular maturation and injury recovery <sup>39</sup> .                                                                                                                                                                                                                                                                       | <i>VANGL1/2</i> : various NTDs <sup>11,41,42</sup> ; <i>VANGL1</i> : caudal regression syndrome in association with NTDs <sup>41</sup> .                                                          |
| <i>Diego (dgo)</i> <sup>43</sup>                                             | <i>Inversin/NPHP2</i> <sup>44</sup><br><i>Diversin/ANKRD6</i> <sup>45</sup>                                                                                                                                 | Ankyrin repeat-containing cytoplasmic proteins. Dgo is recruited to the membrane by Fz and asymmetrically localized; Dgo interacts with Dvl, Fz, Vang and Pk <sup>46</sup> . ANKRD6 is asymmetrically localized in the mouse inner ear cells <sup>47</sup> . Inversin localizes to the ciliary transition zone. Both Inversin and ANKRD6 associate with the basal body. | Widely expressed in all tissues; PCP defects in all tissues studied.                                                                                                                                             | Widely expressed. ANKRD6 and Inversin modulate convergent extension movements, regulate cilia and left-right patterning in vertebrates <sup>44,48</sup> . <i>ANKRD6</i> <sup>-/-</sup> mice display PCP defects in cochlea <sup>47</sup> .                                                                                                                                                                                             | <i>Inversin</i> knockdown in <i>Xenopus</i> : pronephros anomalies <sup>49</sup> . <i>Inversin</i> <sup>-/-</sup> mouse: cystic kidney with interstitial fibrosis <sup>50,51</sup> .                                                                                                                                                                                                                                                                         | <i>NPHP2</i> mutations: nephronophthisis, type II <sup>44</sup> ; <i>ANKRD6</i> mutations: various NTDs <sup>11</sup> .                                                                           |
| <i>Wg*</i><br><i>dWnt2</i><br><i>dWnt4*</i><br><i>dWnt6</i><br><i>dWnt10</i> | <i>Wnt1, Wnt2, Wnt2b/13,</i><br><i>Wnt3, Wnt3a, Wnt4,</i><br><i>Wnt5a*, Wnt5b, Wnt6,</i><br><i>Wnt7a, Wnt7b*?, Wnt8a,</i><br><i>Wnt8b, Wnt9a, Wnt9b*,</i><br><i>Wnt10a, Wnt10b,</i><br><i>Wnt11*, Wnt16</i> | Cysteine-rich secreted signalling lipoproteins. Known to bind to multiple receptors including Fzd, Ror1/2, Ryk1 and Ptk7 via a cysteine-rich domain <sup>52</sup> .                                                                                                                                                                                                     | Often expressed in tissue-specific patterns. The combined loss of <i>Wg</i> or <i>Wnt4</i> leads to loss of PCP in wing <sup>53</sup> ; however, this has not been confirmed by other studies <sup>54,55</sup> . | Many Wnt ligands are expressed in specific patterns, often consistent with concentration gradients. Loss-of-function studies reveal major developmental abnormalities, including PCP phenotypes. Can instruct PCP in several models, but the requirement for PCP may be indirect <sup>56</sup> . <i>Wnt5a</i> <sup>-/-</sup> mice display caudal regression syndrome <sup>57</sup> .                                                   | <i>Wnt5a</i> <sup>-/-</sup> mice: kidney defects range from renal agenesis and single kidney to renal hypoplasia and duplex kidneys <sup>57-59</sup> . <i>Wnt9a</i> <sup>-/-</sup> mice: cystic kidneys, abnormalities of nephrogenic progenitor pool and UB branching <sup>60</sup> ; <i>Wnt11</i> <sup>-/-</sup> mice: hypoplastic kidneys due to loss of polarized NPCs behaviour, premature NPC depletion causing defective UB branching <sup>61</sup> . | <i>WNT5a</i> : Robinow syndrome, including hypoplastic kidneys in some patients <sup>62</sup> ; isolated solitary kidney <sup>59</sup> .                                                          |

|                                               |                                 |                                                                                                                                                                                                                                     |                                                                                                                                                                                        |                                                                                                                                                                                                                                                                                                             |                                                                                                                                                                                                                                                                              |                                                                                                                                                                                                                     |
|-----------------------------------------------|---------------------------------|-------------------------------------------------------------------------------------------------------------------------------------------------------------------------------------------------------------------------------------|----------------------------------------------------------------------------------------------------------------------------------------------------------------------------------------|-------------------------------------------------------------------------------------------------------------------------------------------------------------------------------------------------------------------------------------------------------------------------------------------------------------|------------------------------------------------------------------------------------------------------------------------------------------------------------------------------------------------------------------------------------------------------------------------------|---------------------------------------------------------------------------------------------------------------------------------------------------------------------------------------------------------------------|
| <i>Fat (ft) and Fat2</i> <sup>63</sup>        | <i>Fat1*, Fat2, Fat3, Fat4*</i> | Proto-cadherin with a large extracellular domain containing Cadherin-, Laminin-G-like and EGF-like repeats. Binds to Dchs1 and Dchs2. Phosphorylated by Ft <sup>64</sup> .                                                          | Widely expressed in all tissues; PCP defects in all tissues studied. Participates in Hippo signalling <sup>65</sup> .                                                                  | Multiple defects in all <i>Fat</i> mouse mutants, including neurological, eye and other anomalies <sup>66</sup> . <i>Fat4</i> interacts genetically with <i>Vangl2</i> and <i>Fjx1</i> <sup>67</sup> .                                                                                                      | <i>Fat4</i> <sup>-/-</sup> mouse: hypoplastic cystic kidneys, duplex kidneys, expansion of nephrogenic progenitor zone <sup>67, 68</sup> . <i>Fat1</i> <sup>-/-</sup> mouse: congenital lack of glomerular podocyte slit diaphragm leading to neonatal death <sup>69</sup> . | <i>FAT1</i> : novel syndrome: colobomatous-microphthalmia, ptosis, nephropathy and syndactyly <sup>70</sup> ; isolated glomerulopathy (FSGS) <sup>71</sup> . <i>FAT4</i> : Van Madlergem syndrome 2 <sup>72</sup> . |
| <i>Dachsous (ds)</i> <sup>63</sup>            | <i>Dchs1, Dchs2</i>             | Proto-cadherin (also known as Cadherin16 or Cadherin19), contains cadherin-, Laminin-G-like -repeats in the extracellular domain. Binds to Fat1 and Fat2 receptors. Phosphorylated by Fj. Asymmetrically localized.                 | Widely expressed in all tissues and forms a gradient along <i>Drosophila</i> wing blade and eye; PCP defects in all tissues studied. Participates in Hippo signalling <sup>64</sup> .  | In mouse is widely expressed and required for organogenesis of many tissues including brain, heart, lung, intestine, kidney and ear <sup>72</sup> . The phenotype is similar to <i>Fat4</i> <sup>-/-</sup> <sup>73</sup> .                                                                                  | Dchs1/2: expansion of nephrogenic progenitor zone, UB branching defects, hypoplastic kidney <sup>68, 74</sup> .                                                                                                                                                              | Van Madlergem syndrome 1 with kidney involvement in some patients <sup>72</sup> .                                                                                                                                   |
| <i>Four jointed (fj)</i> <sup>75, 76</sup>    | <i>Fjx1</i> <sup>67</sup>       | Transmembrane protein II, Golgi-associated serine-threonine protein kinase. Interacts with Ft and Ds.                                                                                                                               | Expressed in a gradient in <i>Drosophila</i> wing and eye. PCP defects in the eye and wing. Additionally controls cell growth and differentiation via Hippo signalling <sup>64</sup> . | Required for development of multiple organs including heart, lung, eye and others <sup>67</sup> .                                                                                                                                                                                                           | Exacerbates renal hypoplasia, cystic and duplex kidney phenotypes on <i>Fat4</i> <sup>-/-</sup> background <sup>67</sup> ; partially rescues cystic kidney phenotype in <i>Pkd1</i> <sup>-/-</sup> mice <sup>77</sup> .                                                      | N/D                                                                                                                                                                                                                 |
| <i>Off-track (otk, otk2)</i> <sup>78</sup>    | <i>Ptk7</i> <sup>79</sup>       | Atypical protein tyrosine kinase (enzymatically dead). Interacts with Wnt, Ror2, Dvl.                                                                                                                                               | No PCP phenotypes.                                                                                                                                                                     | Widely expressed in many tissues. <i>Ptk7</i> mutations in mice cause <i>craniorachischisis</i> and <i>spina bifida</i> as well as a decrease in hematopoietic pool <sup>79, 80</sup> . <i>Ptk7</i> interacts genetically with <i>Vangl2</i> to regulate neural tube closure <sup>79</sup> .                | Renal hypoplasia in mice <sup>79</sup>                                                                                                                                                                                                                                       | Various NTDs <sup>11</sup> .                                                                                                                                                                                        |
| <i>Ror</i> <sup>81</sup>                      | <i>Ror1, Ror2</i> <sup>82</sup> | Receptor tyrosine kinase, acts as Wnt5a co-receptor to regulate PCP signalling and convergent extension movements in <i>Xenopus</i> <sup>83, 84</sup> .                                                                             | No PCP phenotype for the null allele.                                                                                                                                                  | Often expressed in tissue-specific manner. Regulates morphogenesis of multiple organs in mice <sup>57</sup> .                                                                                                                                                                                               | <i>Ror1</i> <sup>-/-</sup> and <i>Ror2</i> <sup>-/-</sup> mice: renal hypoplasia, duplex kidneys <sup>57, 85</sup> .                                                                                                                                                         | <i>ROR2</i> : Robinow syndrome including smaller kidneys in some patients <sup>86</sup> .                                                                                                                           |
| <i>Inturned (in)</i> <sup>17, 87</sup>        | <i>Intu</i> <sup>88, 89</sup>   | Interacts with Fuz, Inturned, Dvl, Daam1 and Vangl2 <sup>90, 91</sup> . A part of the functional module with Fuz to form Rab23GEF to control ciliogenesis <sup>92</sup> . Asymmetrically localized in <i>Drosophila</i> wing cells. | Expressed in <i>Drosophila</i> wing cells                                                                                                                                              | Morphogenesis defects in <i>Xenopus</i> , cilia defects <sup>88</sup> . A wide range of defects in <i>Intu</i> <sup>-/-</sup> mice: cranial NTD or hydrocephaly, heart outflow defects, polydactyly, facial abnormalities, hypoplastic liver, lungs, anophthalmia and others, shorter cilia <sup>89</sup> . | N/D                                                                                                                                                                                                                                                                          | SRPS II OFD type II (renal hypoplasia is reported), NPHP <sup>91</sup>                                                                                                                                              |
| <i>Fuzzy (fy)</i> <sup>17, 93</sup>           | <i>Fuz</i> <sup>88</sup>        | LONGIN-domain-containing protein, a part of Rab23GEF <sup>92</sup> , interacts with Fuz, Intu, Dvl and Vangl2. Asymmetrically localized in <i>Drosophila</i> wing cells.                                                            | Expressed in <i>Drosophila</i> wing cells.                                                                                                                                             | Broadly expressed. Loss-of-function phenotypes are similar to those of <i>Intu</i> morphants in <i>Xenopus</i> <sup>88</sup> and <i>Intu</i> <sup>-/-</sup> mice <sup>94</sup> . Involved in endo/exocytosis, ciliogenesis in vertebrates <sup>91, 94</sup> .                                               | Renal hypodysplasia (E. Torban, unpublished work).                                                                                                                                                                                                                           | Various NTDs <sup>95</sup> , SRPS type II (hypoplastic kidneys are reported) <sup>96</sup>                                                                                                                          |
| <i>Fritz</i> <sup>97</sup>                    | <i>WDPCP</i> <sup>98</sup>      | WD-domain-containing protein, regulator of actin and vesicle trafficking                                                                                                                                                            | Broadly expressed in <i>Drosophila</i> wing cells.                                                                                                                                     | Multiple defects in <i>Wdpcp</i> <sup>-/-</sup> mice including heart defects, polydactyly, hypoplastic liver, lungs. Shorter cilia and abnormal ciliogenesis <sup>98</sup> .                                                                                                                                | Renal dysplasia, duplex kidneys <sup>98</sup>                                                                                                                                                                                                                                | SRPS type II OFD type VI Joubert syndrome with renal disease <sup>91</sup>                                                                                                                                          |
| <i>Multiple wing hair (mwh)</i> <sup>17</sup> | Does not exist in vertebrates   | Formin-domain protein, negative regulator of actin polymerization                                                                                                                                                                   | Broadly expressed in <i>Drosophila</i> wing cells                                                                                                                                      | N/A                                                                                                                                                                                                                                                                                                         | N/A                                                                                                                                                                                                                                                                          | N/A                                                                                                                                                                                                                 |
| <i>Daam</i> <sup>99</sup>                     | <i>Daam1, Daam2</i>             | Formin-domain protein, positive regulator of actin polymerization. Interacts with Dvl, RhoA, Intu <sup>100, 101</sup>                                                                                                               | Regulates axon growth and tracheal cuticle pattern <sup>102</sup> and left-right asymmetry <sup>99</sup> .                                                                             | Mouse and <i>Xenopus</i> <i>Daam1/2</i> are widely expressed and may have redundant functions. <i>Daam1</i> genetically interacts with <i>Vangl2</i> and <i>Wnt5a</i> to control caudal development and neural tube closure, respectively <sup>103</sup> .                                                  | <i>Daam1</i> knockdown in <i>Xenopus</i> and zebrafish causes defective pronephric tubulogenesis <sup>104</sup> .                                                                                                                                                            | N/D                                                                                                                                                                                                                 |

The table does not include relevant apicobasal polarity components and PCP effectors that have broad housekeeping functions, such as protein kinases, Rabs and other vesicular trafficking machinery, actin- and tubulin-associated proteins, myosins, small GTPases. GEF, guanine nucleotide exchange factor; N/A, not applicable; N/D, not determined; NPCs, nephron progenitor cells; NPHP, nephronophthisis; NTD, neural tube defects; OFD, oral-facial-digital syndrome; PCP, planar cell polarity; PKD, polycystic kidney disease; SRPS, short rib polydactyly syndrome; UB, ureteric bud; VUR, vesicoureteral reflux.

\*Members of the large gene group known to participate in PCP signalling.

## REFERENCES

1. Vinson, C.R. & Adler, P.N. Directional non-cell autonomy and the transmission of polarity information by the frizzled gene of *Drosophila*. *Nature* **329**, 549-551 (1987).
2. Wang, Y., Chang, H., Rattner, A. & Nathans, J. Frizzled Receptors in Development and Disease. *Curr Top Dev Biol* **117**, 113-139 (2016).
3. Adler, P.N. The frizzled/stan pathway and planar cell polarity in the *Drosophila* wing. *Curr Top Dev Biol* **101**, 1-31 (2012).
4. Bhanot, P. *et al.* A new member of the frizzled family from *Drosophila* functions as a Wingless receptor. *Nature* **382**, 225-230 (1996).
5. Chen, W.S. *et al.* Asymmetric homotypic interactions of the atypical cadherin flamingo mediate intercellular polarity signaling. *Cell* **133**, 1093-1105 (2008).
6. Satow, R., Chan, T.C. & Asashima, M. The role of *Xenopus* frizzled-8 in pronephric development. *Biochem Biophys Res Commun* **321**, 487-494 (2004).
7. Ye, X., Wang, Y., Rattner, A. & Nathans, J. Genetic mosaic analysis reveals a major role for frizzled 4 and frizzled 8 in controlling ureteric growth in the developing kidney. *Development* **138**, 1161-1172 (2011).
8. Kunitomo, K. *et al.* Disruption of Core Planar Cell Polarity Signaling Regulates Renal Tubule Morphogenesis but Is Not Cystogenic. *Curr Biol* **27**, 3120-3131 e3124 (2017).
9. Wang, Y., Guo, N. & Nathans, J. The role of Frizzled3 and Frizzled6 in neural tube closure and in the planar polarity of inner-ear sensory hair cells. *J Neurosci* **26**, 2147-2156 (2006).
10. Robitaille, J. *et al.* Mutant frizzled-4 disrupts retinal angiogenesis in familial exudative vitreoretinopathy. *Nat Genet* **32**, 326-330 (2002).
11. Wang, M., Marco, P., Capra, V. & Kibar, Z. Update on the Role of the Non-Canonical Wnt/Planar Cell Polarity Pathway in Neural Tube Defects. *Cells* **8** (2019).
12. Mlodzik, M. The Dishevelled Protein Family: Still Rather a Mystery After Over 20 Years of Molecular Studies. *Curr Top Dev Biol* **117**, 75-91 (2016).
13. Wynshaw-Boris, A. Dishevelled: in vivo roles of a multifunctional gene family during development. *Curr Top Dev Biol* **101**, 213-235 (2012).
14. Lienkamp, S.S. *et al.* Vertebrate kidney tubules elongate using a planar cell polarity-dependent, rosette-based mechanism of convergent extension. *Nat Genet* **44**, 1382-1387 (2012).
15. White, J. *et al.* DVL1 frameshift mutations clustering in the penultimate exon cause autosomal-dominant Robinow syndrome. *Am J Hum Genet* **96**, 612-622 (2015).
16. White, J.J. *et al.* DVL3 Alleles Resulting in a -1 Frameshift of the Last Exon Mediate Autosomal-Dominant Robinow Syndrome. *Am J Hum Genet* **98**, 553-561 (2016).
17. Gubb, D. & Garcia-Bellido, A. A genetic analysis of the determination of cuticular polarity during development in *Drosophila melanogaster*. *J Embryol Exp Morphol* **68**, 37-57 (1982).
18. Olofsson, J., Sharp, K.A., Matis, M., Cho, B. & Axelrod, J.D. Prickle/spiny-legs isoforms control the polarity of the apical microtubule network in planar cell polarity. *Development* **141**, 2866-2874 (2014).
19. Tao, H. *et al.* Mouse prickle1, the homolog of a PCP gene, is essential for epiblast apical-basal polarity. *Proc Natl Acad Sci U S A* **106**, 14426-14431 (2009).
20. Liu, C. *et al.* Null and hypomorph Prickle1 alleles in mice phenocopy human Robinow syndrome and disrupt signaling downstream of Wnt5a. *Biol Open* (2014).
21. Chuykin, I., Ossipova, O. & Sokol, S.Y. Par3 interacts with Prickle3 to generate apical PCP complexes in the vertebrate neural plate. *Elife* **7** (2018).
22. Bosoi, C.M. *et al.* Identification and characterization of novel rare mutations in the planar cell polarity gene PRICKLE1 in human neural tube defects. *Hum Mutat* **32**, 1371-1375 (2011).
23. Bassuk, A.G. *et al.* A homozygous mutation in human PRICKLE1 causes an autosomal-recessive progressive myoclonus epilepsy-ataxia syndrome. *Am J Hum Genet* **83**, 572-581 (2008).
24. Usui, T. *et al.* Flamingo, a seven-pass transmembrane cadherin, regulates planar cell polarity under the control of Frizzled. *Cell* **98**, 585-595 (1999).
25. Chae, J. *et al.* The *Drosophila* tissue polarity gene starry night encodes a member of the protocadherin family. *Development* **126**, 5421-5429 (1999).
26. Formstone, C.J. & Little, P.F. The flamingo-related mouse Celsr family (Celsr1-3) genes exhibit distinct patterns of expression during embryonic development. *Mech Dev* **109**, 91-94 (2001).
27. Curtin, J.A. *et al.* Mutation of Celsr1 disrupts planar polarity of inner ear hair cells and causes severe neural tube defects in the mouse. *Curr Biol* **13**, 1129-1133 (2003).
28. Tissir, F. *et al.* Lack of cadherins Celsr2 and Celsr3 impairs ependymal ciliogenesis, leading to fatal hydrocephalus. *Nat Neurosci* **13**, 700-707 (2010).
29. Brzoska, H.L. *et al.* Planar cell polarity genes Celsr1 and Vangl2 are necessary for kidney growth, differentiation, and rostrocaudal patterning. *Kidney Int* **90**, 1274-1284 (2016).
30. Robinson, A. *et al.* Mutations in the planar cell polarity genes CELSR1 and SCRIB are associated with the severe neural tube defect craniorachischisis. *Hum Mutat* **33**, 440-447 (2012).
31. Allache, R., De Marco, P., Merello, E., Capra, V. & Kibar, Z. Role of the planar cell polarity gene CELSR1 in neural tube defects and caudal agenesis. *Birth Defects Res A Clin Mol Teratol* **94**, 176-181 (2012).
32. Taylor, J., Abramova, N., Charlton, J. & Adler, P.N. Van Gogh: a new *Drosophila* tissue polarity gene. *Genetics* **150**, 199-210 (1998).
33. Wolff, T. & Rubin, G.M. Strabismus, a novel gene that regulates tissue polarity and cell fate decisions in *Drosophila*. *Development* **125**, 1149-1159 (1998).
34. Kibar, Z. *et al.* Ltap, a mammalian homolog of *Drosophila* Strabismus/Van Gogh, is altered in the mouse neural tube mutant Loop-tail. *Nat Genet* **28**, 251-255 (2001).
35. Bastock, R., Strutt, H. & Strutt, D. Strabismus is asymmetrically localised and binds to Prickle and Dishevelled during *Drosophila* planar polarity patterning. *Development* **130**, 3007-3014 (2003).
36. Wu, J. & Mlodzik, M. The frizzled extracellular domain is a ligand for Van Gogh/Stbm during nonautonomous planar cell polarity signaling. *Dev Cell* **15**, 462-469 (2008).
37. Strong, L.C. & Hollander, W.F. Hereditary Loop-Tail in the House Mouse - Accompanied by Imperforate Vagina and with Lethal Craniorachischisis When Homozygous. *Journal of Heredity* **40**, 329-334 (1949).
38. Montcouquiol, M. *et al.* Identification of Vangl2 and Scrb1 as planar polarity genes in mammals. *Nature* **423**, 173-177 (2003).
39. Rocque, B.L. *et al.* Deficiency of the planar cell polarity protein vangl2 in podocytes affects glomerular morphogenesis and increases susceptibility to injury. *J Am Soc Nephrol* **26**, 576-586 (2015).
40. Derish, I. *et al.* Differential role of planar cell polarity gene Vangl2 in embryonic and adult mammalian kidneys. *PLoS One* **15**, e0230586 (2020).
41. Kibar, Z. *et al.* Mutations in VANGL1 associated with neural-tube defects. *N Engl J Med* **356**, 1432-1437 (2007).
42. Lei, Y.P. *et al.* VANGL2 mutations in human cranial neural-tube defects. *N Engl J Med* **362**, 2232-2235 (2010).
43. Jenny, A., Reynolds-Kenneally, J., Das, G., Burnett, M. & Mlodzik, M. Diego and Prickle regulate Frizzled planar cell polarity signalling by competing for Dishevelled binding. *Nat Cell Biol* **7**, 691-697 (2005).
44. Otto, E.A. *et al.* Mutations in INVS encoding inversin cause nephronophthisis type 2, linking renal cystic disease to the function of primary cilia and left-right axis determination. *Nat Genet* **34**, 413-420 (2003).
45. Schwarz-Romond, T. *et al.* The ankyrin repeat protein Diversin recruits Casein kinase Iepsilon to the beta-catenin degradation complex and acts in both canonical Wnt and Wnt/JNK signaling. *Genes Dev* **16**, 2073-2084 (2002).
46. Das, G., Jenny, A., Klein, T.J., Eaton, S. & Mlodzik, M. Diego interacts with Prickle and Strabismus/Van Gogh to localize planar cell polarity complexes. *Development* **131**, 4467-4476 (2004).
47. Jones, C. *et al.* Ankrd6 is a mammalian functional homolog of *Drosophila* planar cell polarity gene diego and regulates coordinated cellular orientation in the mouse inner ear. *Dev Biol* **395**, 62-72 (2014).
48. Yasunaga, T., Itoh, K. & Sokol, S.Y. Regulation of basal body and ciliary functions by Diversin. *Mech Dev* **128**, 376-386 (2011).
49. Lienkamp, S. *et al.* Inversin relays Frizzled-8 signals to promote proximal pronephros development. *Proc Natl Acad Sci U S A* **107**, 20388-20393 (2010).
50. Mochizuki, T. *et al.* Cloning of inv, a gene that controls left/right asymmetry and kidney development. *Nature* **395**, 177-181 (1998).
51. Morgan, D. *et al.* Inversin, a novel gene in the vertebrate left-right axis pathway, is partially deleted in the inv mouse. *Nat Genet* **20**, 149-156 (1998).
52. van Amerongen, R. & Nusse, R. Towards an integrated view of Wnt signaling in development. *Development* **136**, 3205-3214 (2009).
53. Wu, J., Roman, A.C., Carvajal-Gonzalez, J.M. & Mlodzik, M. Wg and Wnt4 provide long-range directional input to planar cell polarity orientation in *Drosophila*. *Nat Cell Biol* **15**, 1045-1055 (2013).
54. Yu, J.J.S. *et al.* Frizzled-Dependent Planar Cell Polarity without Secreted Wnt Ligands. *Dev Cell* **54**, 583-592 e585 (2020).
55. Ewen-Campen, B., Comyn, T., Vogt, E. & Perrimon, N. No Evidence that Wnt Ligands Are Required for Planar Cell Polarity in *Drosophila*. *Cell Rep* **32**, 108121 (2020).
56. Chu, C.W. & Sokol, S.Y. Wnt proteins can direct planar cell polarity in vertebrate ectoderm. *Elife* **5** (2016).
57. Yun, K. *et al.* Non-canonical Wnt5a/Ror2 signaling regulates kidney morphogenesis by controlling intermediate mesoderm extension. *Hum Mol Genet* (2014).
58. Huang, L. *et al.* Wnt5a is necessary for normal kidney development in zebrafish and mice. *Nephron Exp Nephrol* **128**, 80-88 (2014).
59. Pietila, I. *et al.* Wnt5a Deficiency Leads to Anomalies in Ureteric Tree Development, Tubular Epithelial Cell Organization and Basement Membrane Integrity Pointing to a Role in Kidney Collecting Duct Patterning. *PLoS One* **11**, e0147171 (2016).
60. Carroll, T.J., Park, J.S., Hayashi, S., Majumdar, A. & McMahon, A.P. Wnt9b plays a central role in the regulation of mesenchymal to epithelial transitions underlying organogenesis of the mammalian urogenital system. *Dev Cell* **9**, 283-292 (2005).
61. O'Brien, L.L. *et al.* Wnt11 directs nephron progenitor polarity and motile behavior ultimately determining nephron endowment. *Elife* **7** (2018).
62. Person, A.D. *et al.* WNT5A mutations in patients with autosomal dominant Robinow syndrome. *Dev Dyn* **239**, 327-337 (2010).
63. Fulford, A.D. & McNeill, H. Fat/Dachsous family cadherins in cell and tissue organisation. *Curr Opin Cell Biol* **62**, 96-103 (2020).
64. Fulford, A.D. & McNeill, H. Fat/Dachsous family cadherins in cell and tissue organisation. *Curr Opin Cell Biol* **62**, 96-103 (2019).
65. Matakatsu, H. & Blair, S.S. Separating planar cell polarity and Hippo pathway activities of the protocadherins Fat and Dachsous. *Development* **139**, 1498-1508 (2012).
66. Saburi, S., Hester, I., Goodrich, L. & McNeill, H. Functional interactions between Fat family cadherins in tissue morphogenesis and planar polarity. *Development* **139**, 1806-1820 (2012).
67. Saburi, S. *et al.* Loss of Fat4 disrupts PCP signaling and oriented cell division and leads to cystic kidney disease. *Nat Genet* **40**, 1010-1015 (2008).
68. Bagherie-Lachidan, M. *et al.* Stromal Fat4 acts non-autonomously with Dchs1/2 to restrict the nephron progenitor pool. *Development* **142**, 2564-2573 (2015).

69. Ciani, L., Patel, A., Allen, N.D. & French-Constant, C. Mice lacking the giant protocadherin mFAT1 exhibit renal slit junction abnormalities and a partially penetrant cyclopia and anophthalmia phenotype. *Mol Cell Biol* **23**, 3575-3582 (2003).
70. Lahrouchi, N. *et al.* Homozygous frameshift mutations in FAT1 cause a syndrome characterized by colobomatous-microphthalmia, ptosis, nephropathy and syndactyly. *Nat Commun* **10**, 1180 (2019).
71. Gee, H.Y. *et al.* FAT1 mutations cause a glomerulotubular nephropathy. *Nat Commun* **7**, 10822 (2016).
72. Cappello, S. *et al.* Mutations in genes encoding the cadherin receptor-ligand pair DCHS1 and FAT4 disrupt cerebral cortical development. *Nat Genet* **45**, 1300-1308 (2013).
73. Mao, Y. *et al.* Characterization of a Dchs1 mutant mouse reveals requirements for Dchs1-Fat4 signaling during mammalian development. *Development* **138**, 947-957 (2011).
74. Mao, Y., Francis-West, P. & Irvine, K.D. Fat4/Dchs1 signaling between stromal and cap mesenchyme cells influences nephrogenesis and ureteric bud branching. *Development* **142**, 2574-2585 (2015).
75. Ishikawa, H.O., Takeuchi, H., Haltiwanger, R.S. & Irvine, K.D. Four-jointed is a Golgi kinase that phosphorylates a subset of cadherin domains. *Science* **321**, 401-404 (2008).
76. Brittle, A.L., Repiso, A., Casal, J., Lawrence, P.A. & Strutt, D. Four-jointed modulates growth and planar polarity by reducing the affinity of dachsous for fat. *Curr Biol* **20**, 803-810 (2010).
77. Formica, C. *et al.* Four-jointed knock-out delays renal failure in an ADPKD model with kidney injury. *J Pathol* **249**, 114-125 (2019).
78. Linnemannstons, K. *et al.* The PTK7-related transmembrane proteins off-track and off-track 2 are co-receptors for Drosophila Wnt2 required for male fertility. *PLoS Genet* **10**, e1004443 (2014).
79. Lu, X. *et al.* PTK7/CCK-4 is a novel regulator of planar cell polarity in vertebrates. *Nature* **430**, 93-98 (2004).
80. Lhoumeau, A.C. *et al.* Ptk7-Deficient Mice Have Decreased Hematopoietic Stem Cell Pools as a Result of Deregulated Proliferation and Migration. *J Immunol* **196**, 4367-4377 (2016).
81. Ripp, C. *et al.* Drosophila Ror is a nervous system-specific co-receptor for Wnt ligands. *Biol Open* **7** (2018).
82. Minami, Y., Oishi, I., Endo, M. & Nishita, M. Ror-family receptor tyrosine kinases in noncanonical Wnt signaling: their implications in developmental morphogenesis and human diseases. *Dev Dyn* **239**, 1-15 (2010).
83. Hikasa, H., Shibata, M., Hiratani, I. & Taira, M. The Xenopus receptor tyrosine kinase Xror2 modulates morphogenetic movements of the axial mesoderm and neuroectoderm via Wnt signaling. *Development* **129**, 5227-5239 (2002).
84. Gao, B. *et al.* Wnt signaling gradients establish planar cell polarity by inducing Vangl2 phosphorylation through Ror2. *Dev Cell* **20**, 163-176 (2011).
85. Qi, X., Okinaka, Y., Nishita, M. & Minami, Y. Essential role of Wnt5a-Ror1/Ror2 signaling in metanephric mesenchyme and ureteric bud formation. *Genes Cells* **21**, 325-334 (2016).
86. van Bokhoven, H. *et al.* Mutation of the gene encoding the ROR2 tyrosine kinase causes autosomal recessive Robinow syndrome. *Nat Genet* **25**, 423-426 (2000).
87. Yun, U.J. *et al.* The inturned protein of Drosophila melanogaster is a cytoplasmic protein located at the cell periphery in wing cells. *Dev Genet* **25**, 297-305 (1999).
88. Park, T.J., Haigo, S.L. & Wallingford, J.B. Ciliogenesis defects in embryos lacking inturned or fuzzy function are associated with failure of planar cell polarity and Hedgehog signaling. *Nat Genet* **38**, 303-311 (2006).
89. Zeng, H., Hoover, A.N. & Liu, A. PCP effector gene Inturned is an important regulator of cilia formation and embryonic development in mammals. *Dev Biol* **339**, 418-428 (2010).
90. Wang, Y., Yan, J., Lee, H., Lu, Q. & Adler, P.N. The proteins encoded by the drosophila planar polarity effector genes inturned, fuzzy and fritz interact physically and can re-pattern the accumulation of "upstream" planar cell polarity proteins. *Dev Biol* (2014).
91. Toriyama, M. *et al.* The ciliopathy-associated CPLANE proteins direct basal body recruitment of intraflagellar transport machinery. *Nat Genet* **48**, 648-656 (2016).
92. Gerondopoulos, A. *et al.* Planar Cell Polarity Effector Proteins Inturned and Fuzzy Form a Rab23 GEF Complex. *Curr Biol* **29**, 3323-3330 e3328 (2019).
93. Collier, S. & Gubb, D. Drosophila tissue polarity requires the cell-autonomous activity of the fuzzy gene, which encodes a novel transmembrane protein. *Development* **124**, 4029-4037 (1997).
94. Gray, R.S. *et al.* The planar cell polarity effector Fuz is essential for targeted membrane trafficking, ciliogenesis and mouse embryonic development. *Nat Cell Biol* **11**, 1225-1232 (2009).
95. Seo, J.H. *et al.* Mutations in the planar cell polarity gene, Fuzzy, are associated with neural tube defects in humans. *Hum Mol Genet* **20**, 4324-4333 (2011).
96. Zhang, W. *et al.* Expanding the genetic architecture and phenotypic spectrum in the skeletal ciliopathies. *Hum Mutat* **39**, 152-166 (2018).
97. Collier, S., Lee, H., Burgess, R. & Adler, P. The WD40 repeat protein fritz links cytoskeletal planar polarity to frizzled subcellular localization in the Drosophila epidermis. *Genetics* **169**, 2035-2045 (2005).
98. Cui, C. *et al.* Wdpcp, a PCP protein required for ciliogenesis, regulates directional cell migration and cell polarity by direct modulation of the actin cytoskeleton. *PLoS Biol* **11**, e1001720 (2013).
99. Chougule, A. *et al.* The Drosophila actin nucleator DAAM is essential for left-right asymmetry. *PLoS Genet* **16**, e1008758 (2020).
100. Yasunaga, T. *et al.* The polarity protein Inturned links NPHP4 to Daam1 to control the subapical actin network in multiciliated cells. *J Cell Biol* **211**, 963-973 (2015).
101. Habas, R., Kato, Y. & He, X. Wnt/Frizzled activation of Rho regulates vertebrate gastrulation and requires a novel Formin homology protein Daam1. *Cell* **107**, 843-854 (2001).
102. Gombos, R. *et al.* The Formin DAAM Functions as Molecular Effector of the Planar Cell Polarity Pathway during Axonal Development in Drosophila. *J Neurosci* **35**, 10154-10167 (2015).
103. Nakaya, M.A. *et al.* Placental defects lead to embryonic lethality in mice lacking the Formin and PCP proteins Daam1 and Daam2. *PLoS One* **15**, e0232025 (2020).
104. Miller, R.K. *et al.* Pronephric tubulogenesis requires Daam1-mediated planar cell polarity signaling. *J Am Soc Nephrol* **22**, 1654-1664 (2011).
